# Supplementary material for: Discovery of New Triterpenoids Extracted from Camellia oleifera Seed Cake and the Molecular Mechanism Underlying Their Antitumor Activity
Source: MDPI journal article supplement (doi:10.3390/antiox12010007), 2022-12-21
Supplement: s1 [file s1]

## Supplementary data

Table S1. Cytotoxic activities of total saponin and total aglycone fractions.

| Cell lines | sample         | survival % |         |         |         |        |        |        | ED <sub>50</sub> ( M) |
|------------|----------------|------------|---------|---------|---------|--------|--------|--------|-----------------------|
|            |                | 3.125      | 6.25    | 12.5    | 25      | 50     | 100    | 200    |                       |
| A549       | total saponin  | 82.71%     | 75.16%  | 64.60%  | 49.62%  | 1.67%  | 1.67%  | 2.19%  | 25.77                 |
|            |                | 87.93%     | 62.52%  | 59.52%  | 31.38%  | 1.15%  | 1.02%  | 1.41%  |                       |
|            |                | 78.02%     | 78.81%  | 63.04%  | 39.85%  | 0.11%  | 0.11%  | 0.37%  |                       |
|            |                | 71.77%     | 71.64%  | 60.43%  | 39.59%  | 3.24%  | 3.63%  | 3.11%  |                       |
|            |                | 67.47%     | 60.04%  | 54.70%  | 35.29%  | 1.02%  | 1.28%  | 1.67%  |                       |
|            |                | 67.86%     | 66.04%  | 48.84%  | 50.01%  | 0.89%  | 0.89%  | 1.80%  |                       |
|            | total aglycone | 93.19%     | 67.43%  | 42.99%  | 1.27%   | 8.15%  | 2.15%  | 1.27%  | 15.04                 |
|            |                | 71.09%     | 36.98%  | 45.18%  | 12.69%  | 10.05% | 1.27%  | 0.83%  |                       |
|            |                | 76.95%     | 48.55%  | 41.08%  | 7.42%   | 9.90%  | 0.98%  | 2.00%  |                       |
|            |                | 73.58%     | 52.94%  | 39.03%  | 19.71%  | 12.10% | 4.78%  | 3.61%  |                       |
|            |                | 7.86%      | 57.18%  | 42.99%  | 11.08%  | 10.34% | 1.12%  | 1.56%  |                       |
|            |                | 57.33%     | 62.45%  | 44.01%  | 15.61%  | 12.10% | 2.88%  | 2.59%  |                       |
| hela       | total saponin  | 9.24%      | 67.24%  | 82.72%  | 94.26%  | 61.86% | 1.98%  | 2.61%  | 56.84                 |
|            |                | 73.08%     | 118.44% | 52.70%  | 63.92%  | 85.41% | 1.19%  | 1.82%  |                       |
|            |                | 58.55%     | 91.89%  | 102.95% | 77.51%  | 56.97% | 1.03%  | 0.40%  |                       |
|            |                | 56.33%     | 67.24%  | 20.94%  | 93.47%  | 74.03% | 4.03%  | 3.71%  |                       |
|            |                | 103.27%    | 90.62%  | 95.05%  | 87.15%  | 88.73% | 1.98%  | 3.08%  |                       |
|            |                | 134.87%    | 99.16%  | 96.63%  | 104.06% | 81.14% | 1.19%  | 1.34%  |                       |
|            | total aglycone | 156.20%    | 79.00%  | 51.59%  | 11.61%  | 7.59%  | 3.81%  | 6.83%  | 4.211                 |
|            |                | 175.82%    | 76.99%  | 33.49%  | 7.08%   | 2.31%  | 2.05%  | 2.81%  |                       |
|            |                | 170.03%    | 59.64%  | 27.70%  | 6.83%   | 1.55%  | 0.54%  | 2.05%  |                       |
|            |                | 98.62%     | 69.95%  | 26.45%  | 11.36%  | 12.62% | 6.08%  | 5.83%  |                       |
|            |                | 121.00%    | 89.06%  | 23.68%  | 10.85%  | 2.81%  | 2.81%  | 1.80%  |                       |
|            |                | 130.55%    | 80.01%  | 29.21%  | 11.61%  | 9.60%  | 2.56%  | 2.05%  |                       |
| HepG2      | total saponin  | 96.84%     | 84.14%  | 55.83%  | 49.55%  | 22.26% | 1.97%  | 12.04% | 37.69                 |
|            |                | 76.70%     | 110.27% | 99.90%  | 107.05% | 21.53% | 2.26%  | 14.67% |                       |
|            |                | 92.02%     | 78.89%  | 75.68%  | 93.04%  | 24.01% | 1.82%  | 8.25%  |                       |
|            |                | 74.22%     | 77.86%  | 74.36%  | 74.36%  | 15.25% | 4.16%  | 21.82% |                       |
|            |                | 82.10%     | 78.45%  | 73.34%  | 67.06%  | 12.48% | 1.39%  | 7.66%  |                       |
|            |                | 83.85%     | 105.16% | 104.28% | 81.37%  | 17.59% | 0.07%  | 7.08%  |                       |
|            | total aglycone | 111.21%    | 88.52%  | 112.49% | 46.30%  | 27.69% | 22.22% | 21.17% | 18.28                 |
|            |                | 104.69%    | 119.35% | 98.53%  | 73.52%  | 24.08% | 20.01% | 20.01% |                       |
|            |                | 94.22%     | 93.29%  | 63.51%  | 30.59%  | 20.12% | 20.01% | 19.54% |                       |
|            |                | 104.81%    | 98.41%  | 68.40%  | 42.11%  | 20.59% | 21.40% | 21.64% |                       |
|            |                | 100.74%    | 88.64%  | 68.40%  | 20.24%  | 18.96% | 19.19% | 19.54% |                       |
|            |                | 103.53%    | 95.27%  | 78.87%  | 51.53%  | 18.96% | 19.19% | 23.26% |                       |
